# Supplementary material for: Band structure tuning of α-MoO3 by tin intercalation for ultrafast photonic applications
Source: Royal Society of Chemistry journal article supplement (doi:10.1039/d0nr05935h), 2020-01-01
Supplement: d0nr05935h1.pdf [file d0nr05935h1.pdf]

## Supporting Information

### **Band Structure Tuning of $\alpha$ -MoO<sub>3</sub> by Tin Intercalation for Ultrafast Photonics Applications**

Jiamei Lin<sup>a, c</sup>; Hualong Chen<sup>a</sup>; Dingtao Ma<sup>b</sup>; Youning Gong<sup>\*, a</sup>; Zhongjun Li<sup>a</sup>; Delong Li<sup>\*, a</sup>; Yufeng Song<sup>a</sup>; Feng Zhang<sup>a</sup>; Jianqing Li<sup>b</sup>; Hongcheng Wang<sup>c</sup>; Yupeng Zhang<sup>a</sup>; Han Zhang<sup>\*, a</sup>;

<sup>a</sup>Institute of Microscale Optoelectronics, Collaborative Innovation Center for Optoelectronic Science and Technology and Key Laboratory of Optoelectronic Devices and Systems of Ministry of Education and Guangdong Province, Shenzhen University, Shenzhen 518060, P. R. China

<sup>b</sup>Faculty of Information Technology, Macau University of Science and Technology, Taipa, Macau SAR 999078, P. R. China

<sup>c</sup>School of Electrical Engineering and Intelligentization Dongguan University of Technology Dongguan, 523808, P. R. China

Email: nickgon@whu.edu.cn, ypzhang@szu.edu.cn, hzhang@szu.edu.cn

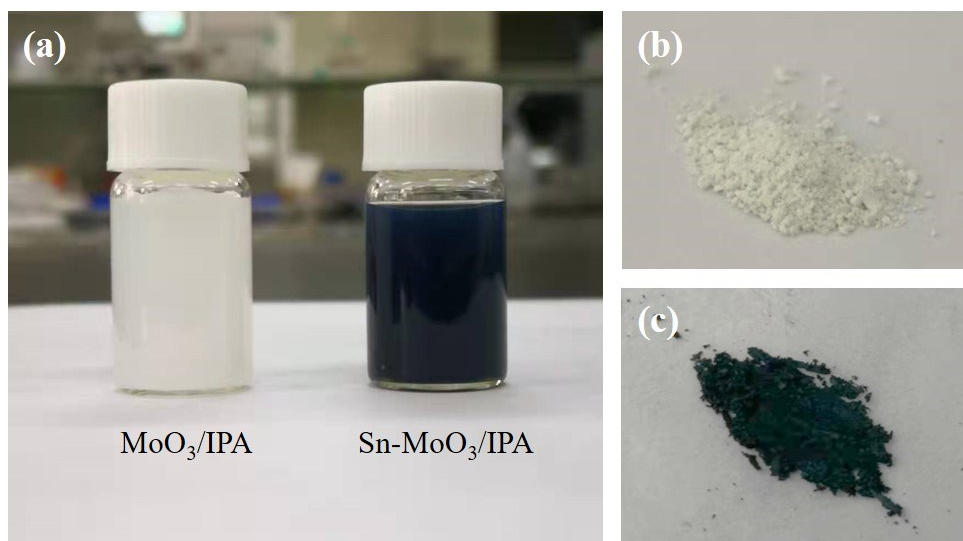

**Figure S1.** The digital images of (a) MoO<sub>3</sub>/IPA, Sn-MoO<sub>3</sub>/IPA dispersion; (b) MoO<sub>3</sub> and (c) Sn-MoO<sub>3</sub> powder.

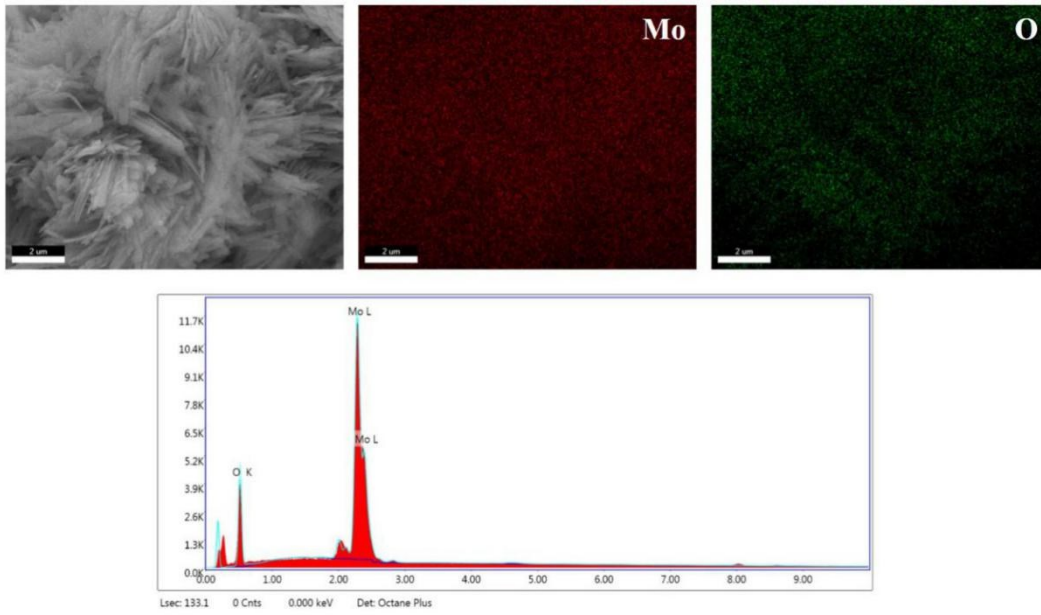

**Figure S2.** SEM image of the MoO<sub>3</sub> nanoribbons, with corresponding EDS mappings of Mo and O elements.

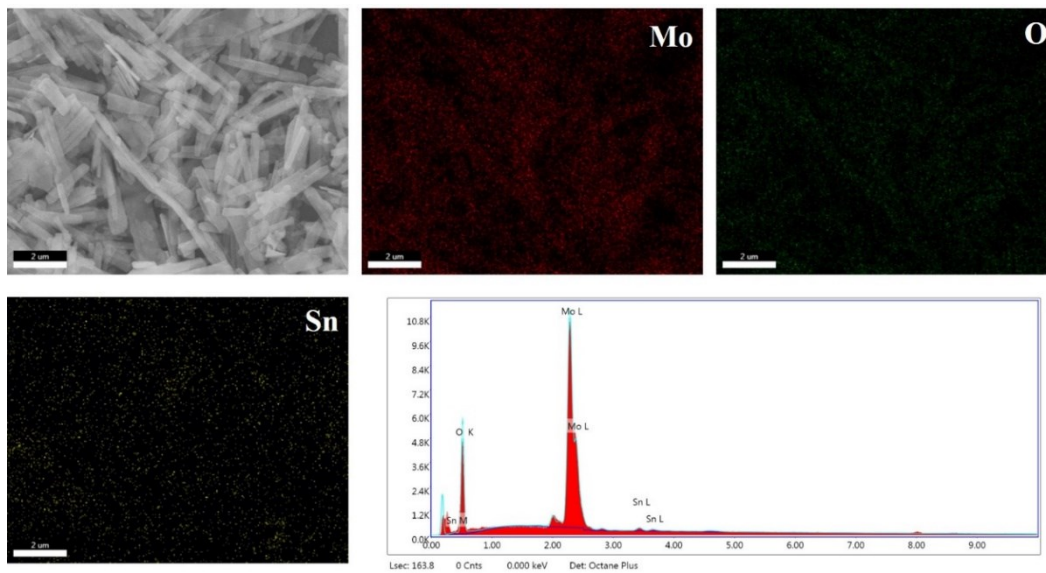

**Figure S3.** SEM image of the Sn-MoO<sub>3</sub> nanoribbons, with corresponding EDS mappings of Mo, O, and Sn elements.

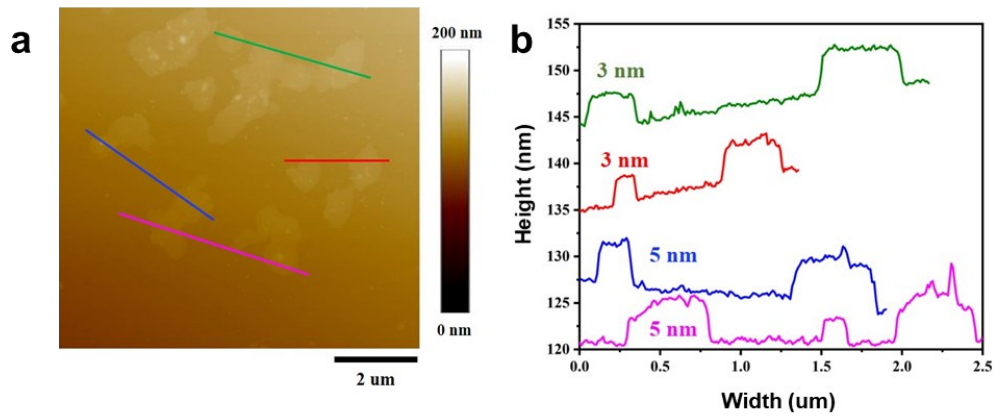

Figure S4. (a) AFM images of Sn-MoO<sub>3</sub> and (b) corresponding height profiles.

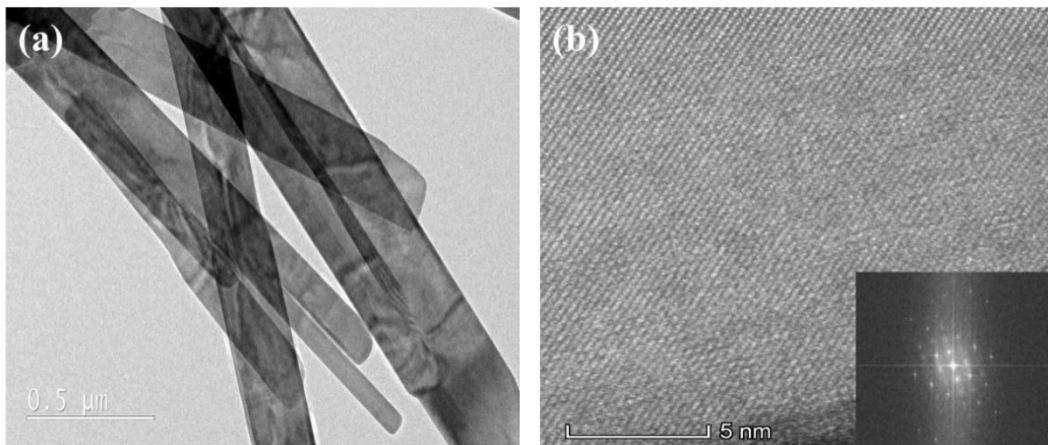

Figure S5. (a) TEM and (b) HRTEM images of MoO<sub>3</sub> nanoribbons.

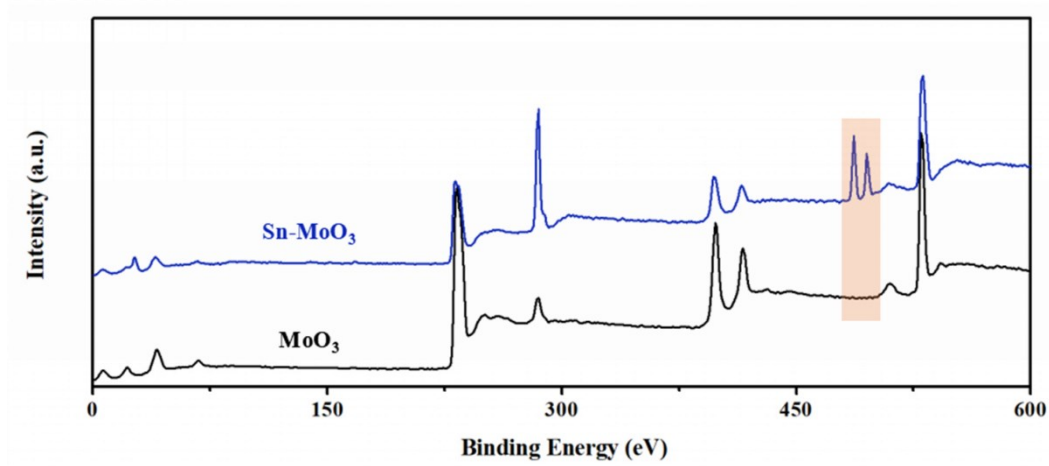

**Figure S6.** The XPS spectra of MoO<sub>3</sub> nanoribbons

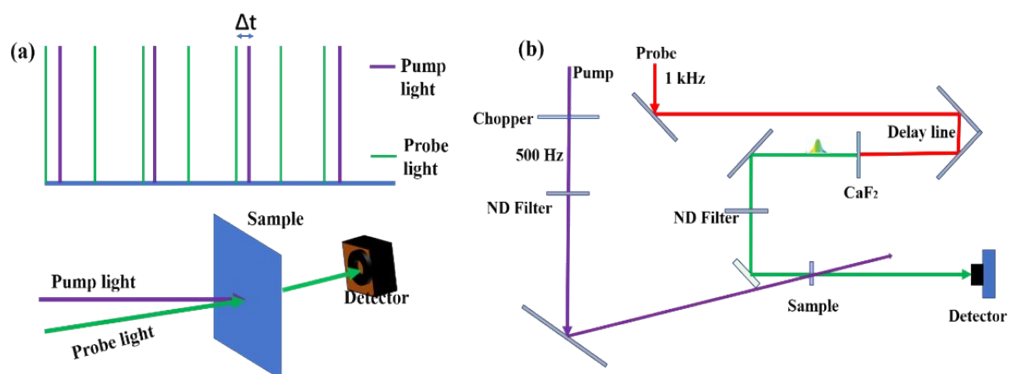

**Figure S7.** The work principle of pump probe setup. (a) The relationship between pump light and probe light in time domain and space domain; (b) The schematic diagram of pump probe setup.

**Table S1:** Carrier dynamics amplitude and relaxation times

| Materials                   | $A_1$    | $\tau_1$ (fs) | $A_2$   | $\tau_2$ (ps) | $A_3$    | $\tau_3$ (ps) |
|-----------------------------|----------|---------------|---------|---------------|----------|---------------|
| MoO <sub>3</sub> @508 nm    | 0.0104   | 426.5         | 0.00555 | 419.9         | -        | -             |
| Sn-MoO <sub>3</sub> @508 nm | 0.0123   | 228.6         | 0.00462 | 402.4         | -        | -             |
| MoO <sub>3</sub> @749 nm    | -0.00509 | 356.1         | 0.00064 | 299.8         | -0.00054 | 2.384         |
| Sn-MoO <sub>3</sub> @749 nm | -0.0073  | 227.8         | 0.00078 | 289.4         | -0.00098 | 0.845         |

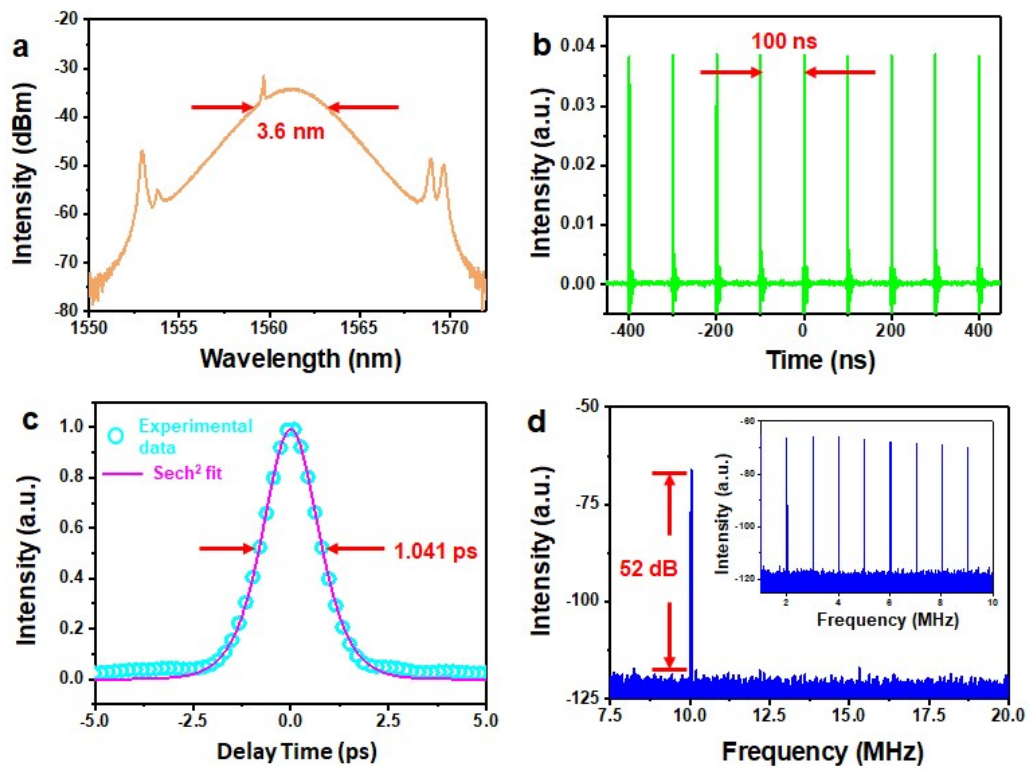

**Figure S8.** The nonlinear optical effect of MoO<sub>3</sub> in 1.5 μm; (a) Optical spectrum, (b) corresponding pulse train, (c) auto-correlation trace, (d) RF spectrum.
